# Supplementary material for: Common disease signatures from gene expression analysis in Huntington’s disease human blood and brain
Source: Orphanet J Rare Dis. 2016 Aug 1;11:97. doi: 10.1186/s13023-016-0475-2 (PMC4968014; doi:10.1186/s13023-016-0475-2)
Supplement: Additional file 9 — Synapse signature. In this file we include detailed information about the synapse signature, including the annotations and gene identifiers of each module that participates in this signature. (XLS 12.5 kb) [file 13023_2016_475_MOESM9_ESM.xls]

## Sheet: blood_module_annotations_CC
ampa receptor location
post-synaptic density
ionotropic glutamate receptor complex
endosomal sorting complex required for transport location
Presynaptic Terminals
calmodulin-dependent protein kinase activity
Synapses
Excitatory Synapse
juxtaparanode region of axon
potassium channel complex
Spliceosomes
Nerve Endings
Synaptic Vesicles
Dendritic Spines
cell body
Synaptosomes
cell body of neuron
Autophagic vacuoles
Postsynaptic Membrane
Dendrites

## Sheet: caudate_module_annotations_CC
Presynaptic Terminals
Synaptic Vesicles
dendritic shaft
Nerve Endings
Excitatory Synapse
asymmetric synapse
ampa receptor location
Dendritic Spines
Synapses
SMN Complex
Neurites
symmetric synapse
Synaptosomes
cell body
cell body of neuron
axon varicosity
climbing fiber
Dendrites
post-synaptic density
Growth Cones

## Sheet: blood_module_gene_ids
ENSG00000164418
ENSG00000212658
ENSG00000255847
ENSG00000172678
ENSG00000216718
ENSG00000254004
ENSG00000235821
ENSG00000228997
ENSG00000173805
ENSG00000257638
ENSG00000198218
ENSG00000239315
ENSG00000179157
ENSG00000239291
ENSG00000158748
ENSG00000242858
ENSG00000239246
ENSG00000226945
ENSG00000116521
ENSG00000238932
ENSG00000229643
ENSG00000248318
ENSG00000230020
ENSG00000085662
ENSG00000215326
ENSG00000256963
ENSG00000165943
ENSG00000089250
ENSG00000225246
ENSG00000232368
ENSG00000239615
ENSG00000237953
ENSG00000144406
ENSG00000232217
ENSG00000236813
ENSG00000228379
ENSG00000151778
ENSG00000140830
ENSG00000237709
ENSG00000223568
ENSG00000187893
ENSG00000224646
ENSG00000162511
ENSG00000256618
ENSG00000169282
ENSG00000197582

## Sheet: caudate_module_gene_ids
7447
57030
57030
885
1996
9607
3356
4208
9568
4761
3763
83988
23467
23544
26038
51299
65997
9956
63974
57084
