# Supplementary material for: Common disease signatures from gene expression analysis in Huntington’s disease human blood and brain
Source: Springer Nature journal article supplement (doi:10.1186/s13023-016-0475-2), 2016-07-12
Supplement: MOESM1 [file 13023_2016_475_MOESM1_ESM.pdf]

# WGCNA in brain dataset

Significantly correlated modules from caudate, cerebellum, BA4 and BA9 to the disease phenotypes

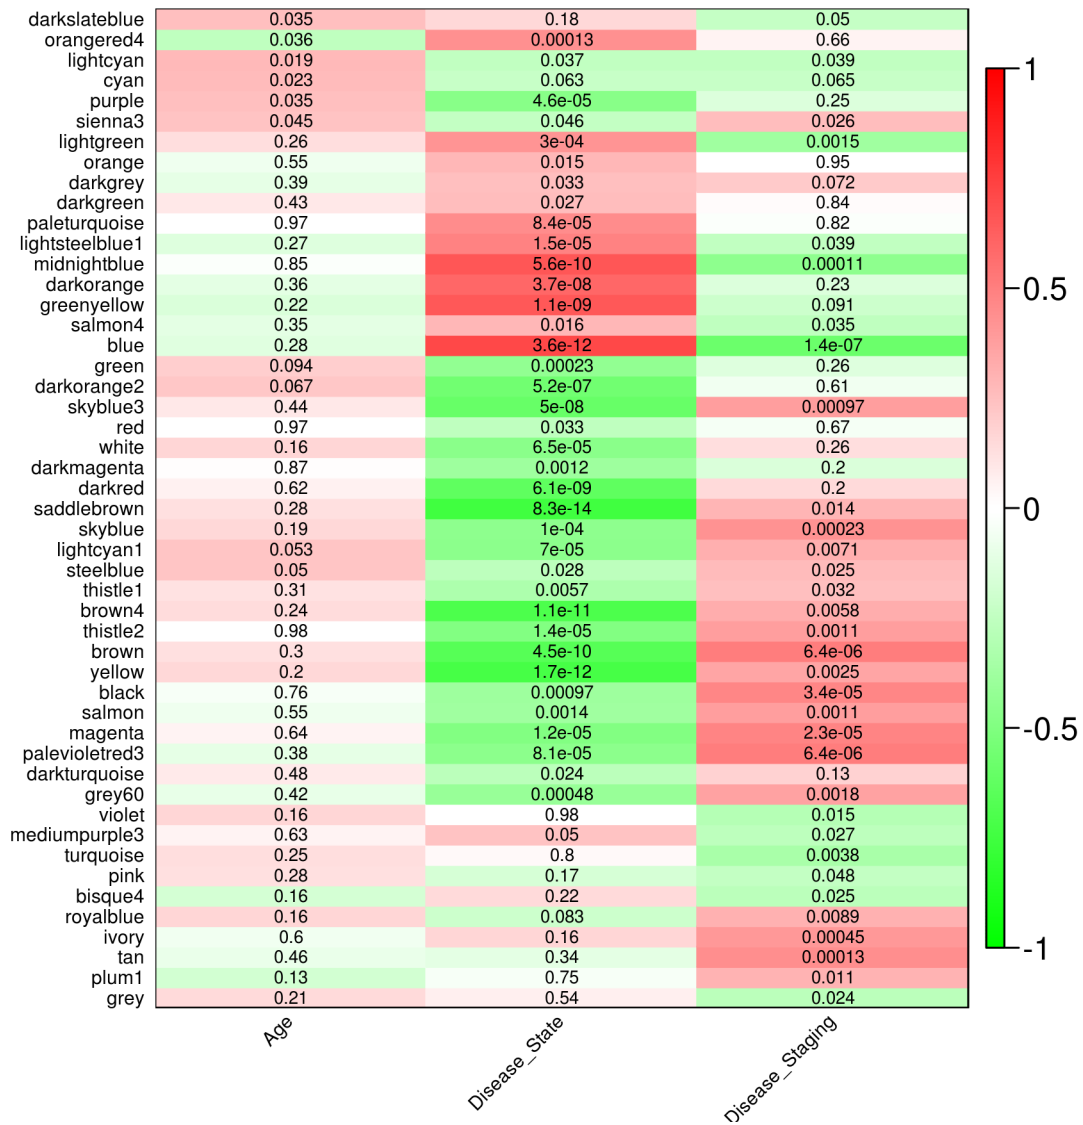

Figure 1 Significantly correlated modules from the caudate nucleus

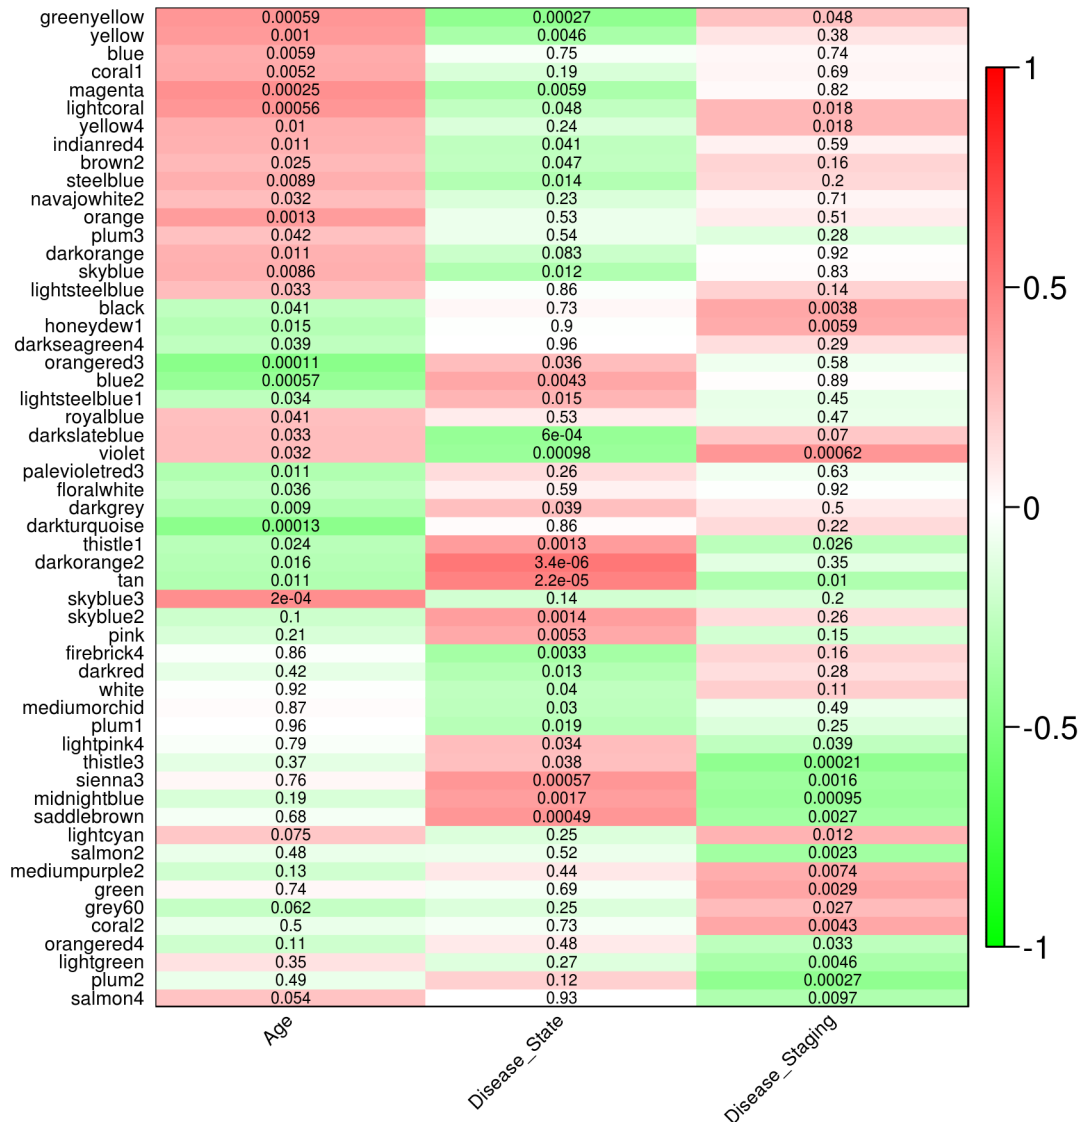

Figure 2 Significantly correlated modules from the cerebellum

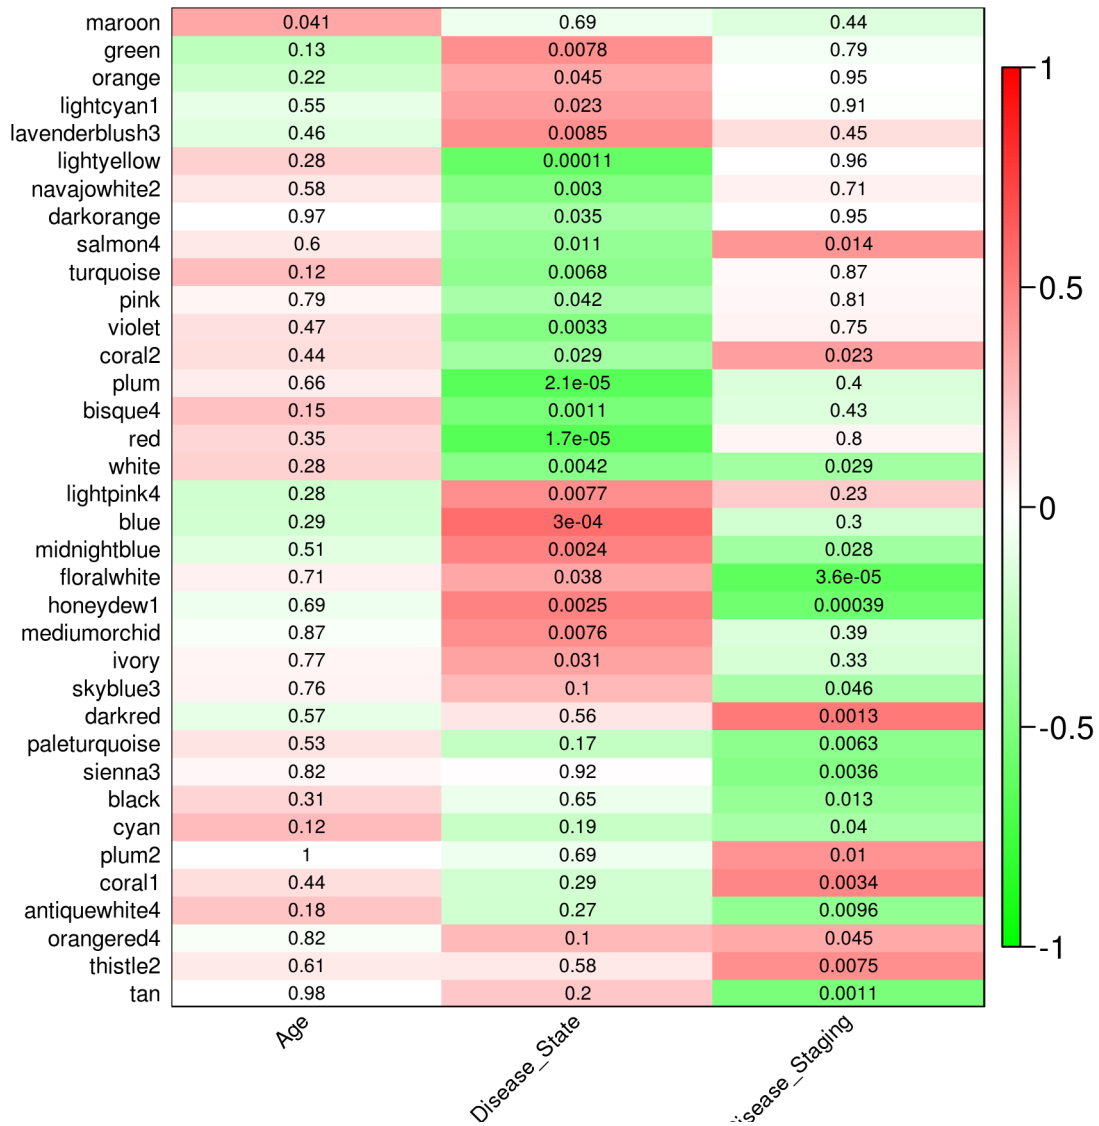

Figure 3 Significantly correlated modules from the BA4

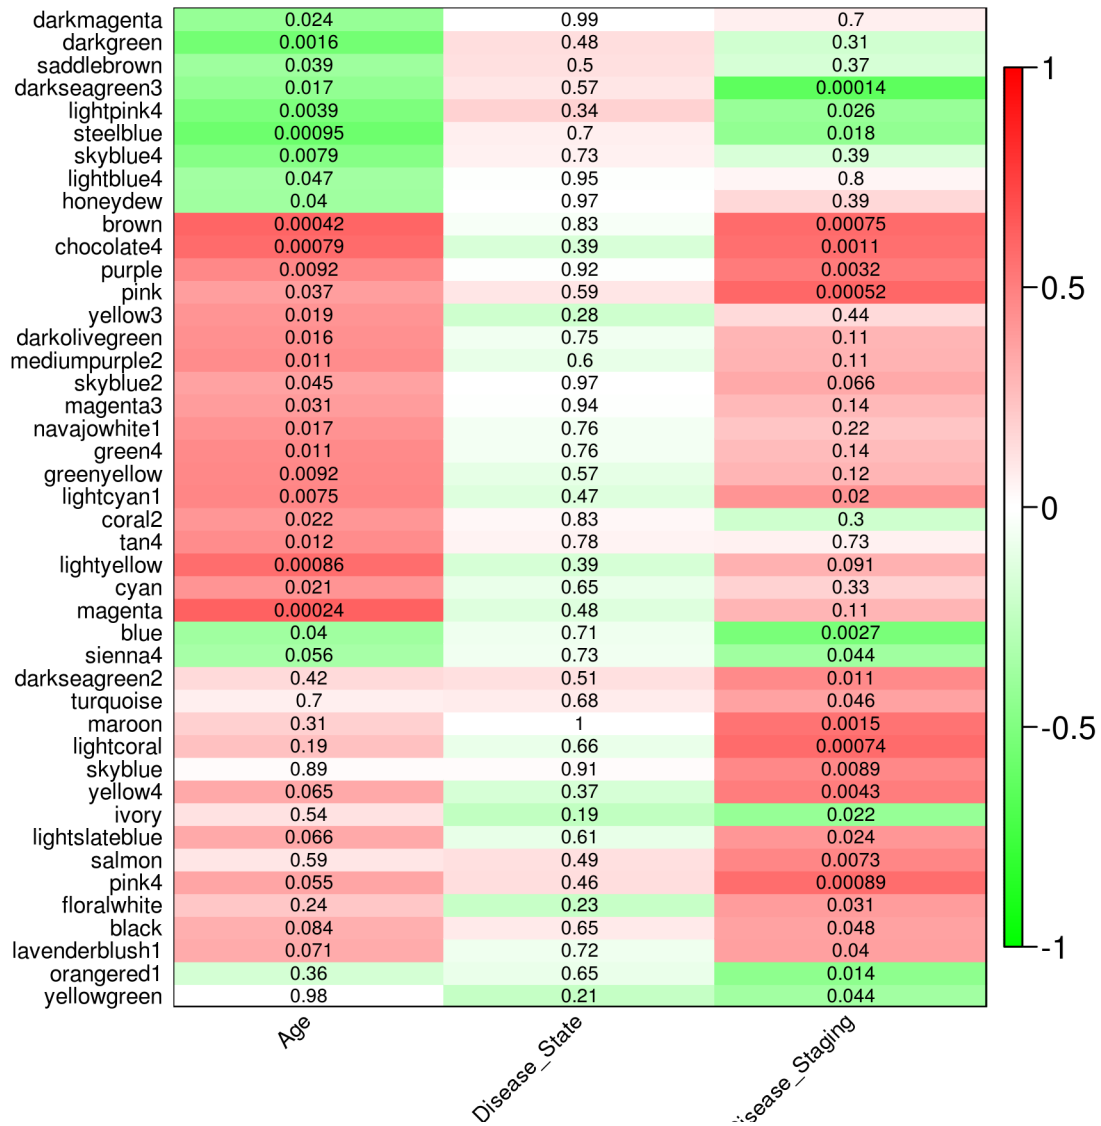

Figure 4 Significantly correlated modules from the BA9
